# Supplementary material for: Theranostic system for ratiometric fluorescence monitoring of peptide-guided targeted drug delivery
Source: Royal Society of Chemistry journal article supplement (doi:10.1039/c9ra06334j), 2019-01-01
Supplement: c9ra06334j2.pdf [file c9ra06334j2.pdf]

## Electronic Supplementary Information (ESI)

### Theranostic system for ratiometric fluorescence monitoring of peptide-guided targeted drug delivery

Alex Rozovsky,<sup>a</sup> Ebaston T. M.,<sup>a</sup> Alisa Zaporozhets,<sup>a</sup> Andrii Bazylevich,<sup>a</sup> Helena Tuchinsky,<sup>b</sup> Leonid Patsenker,<sup>a,\*</sup> and Gary Gellerman<sup>a,\*</sup>

<sup>a</sup> Department of Chemical Sciences, Ariel University, PO Box 3, Ariel 40700, Israel  
E-mail: leonidpa@ariel.ac.il, garyg@ariel.ac.il

<sup>b</sup> Department of Molecular Biology, Ariel University, PO Box 3, Ariel 40700, Israel

### Table of Contents

|                                             |   |
|---------------------------------------------|---|
| 1. Absorption and fluorescence spectra..... | 1 |
| 2. NMR, MS and HPLC data .....              | 2 |

### 1. Absorption and fluorescence spectra

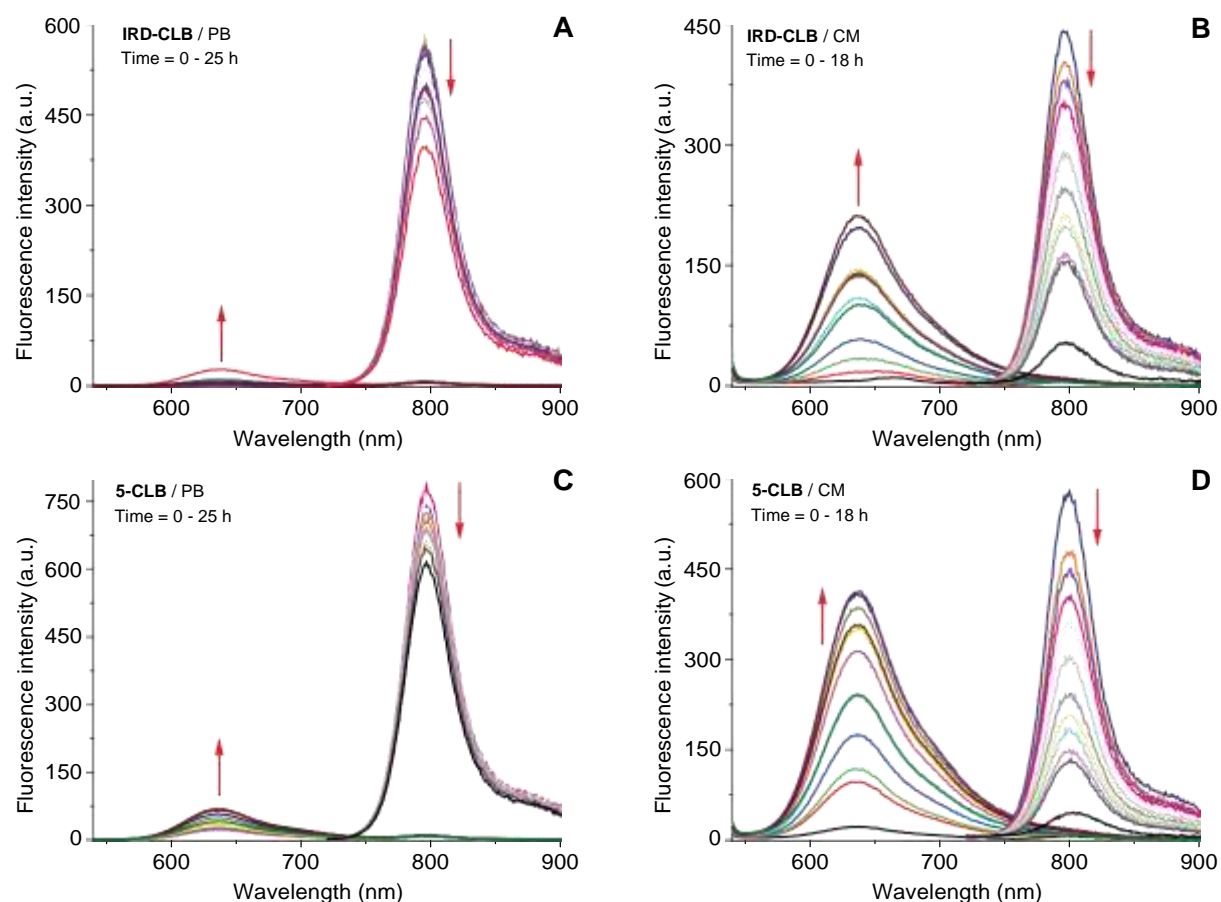

**Fig. S1** The time-dependent spectra of IRD-CLB (A, B) and 5-CLB (C, D) in PB (A, C) and CM (B, D) measured at  $T=25^{\circ}\text{C}$  after incubation at  $37^{\circ}\text{C}$ . The excitation wavelength was 532 nm for RD (shorter-wavelength emission bands) and 720 nm for IRD-CLB and 5-CLB (longer-wavelength emission bands).

## 2. NMR, MS and HPLC data

Print of all graphic windows

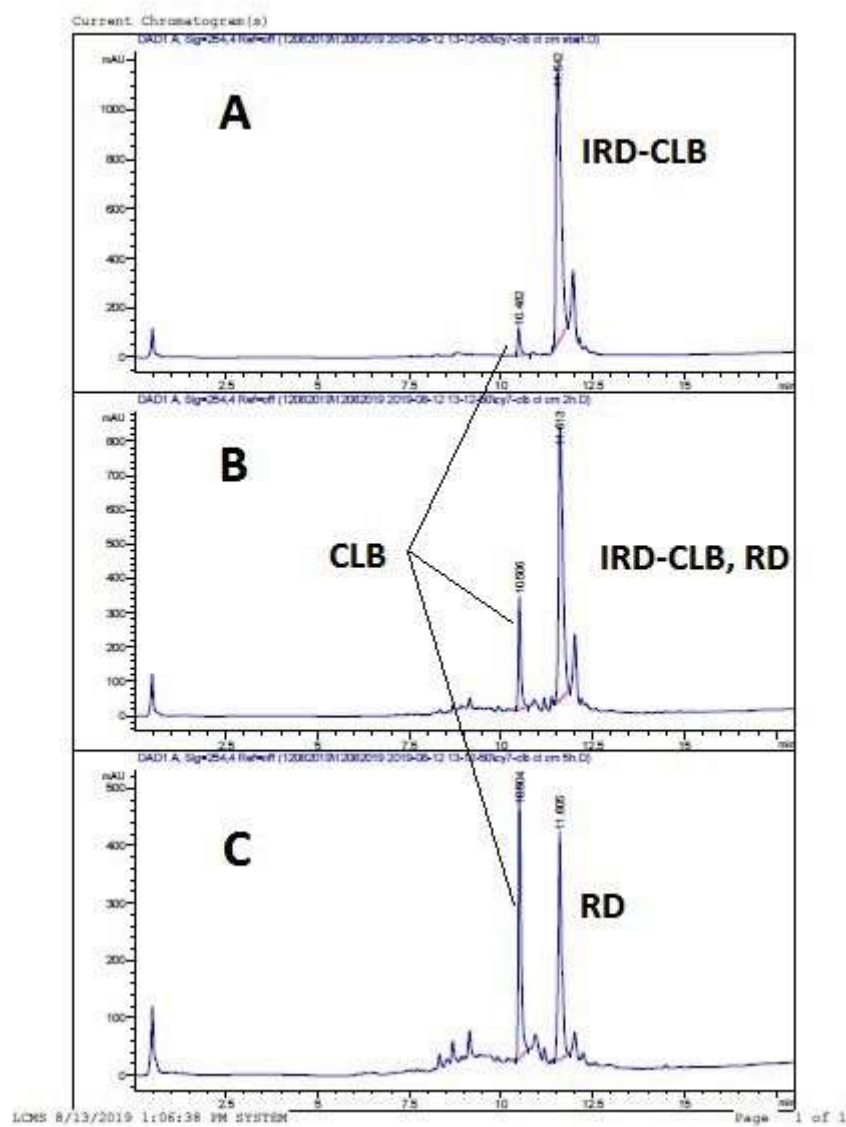

Fig. S2 Cleavage of IRD-CLB in CM over time: A - time 0, B - 2 h and C - 5 h.

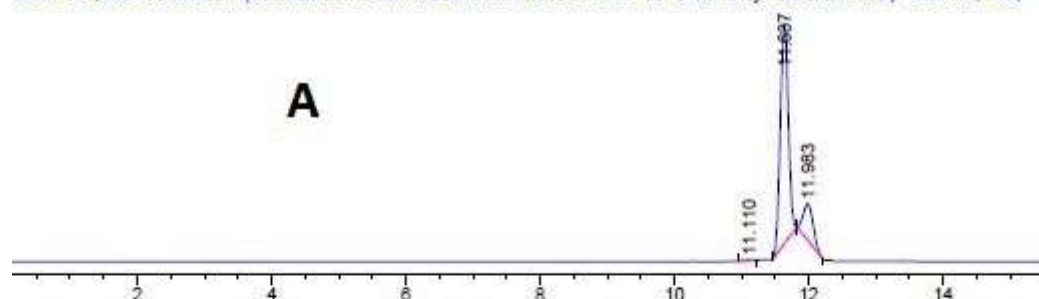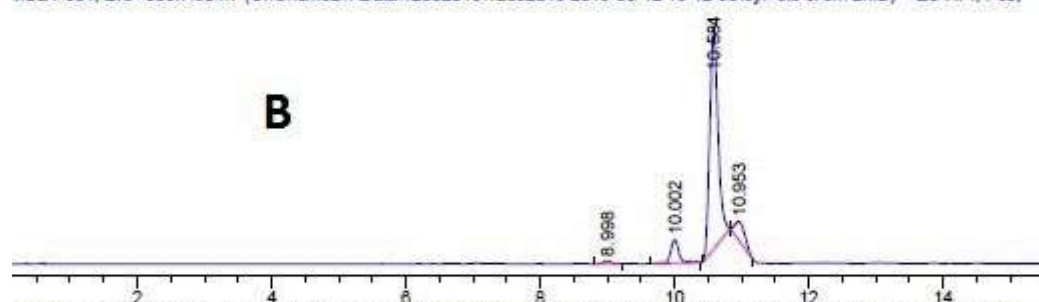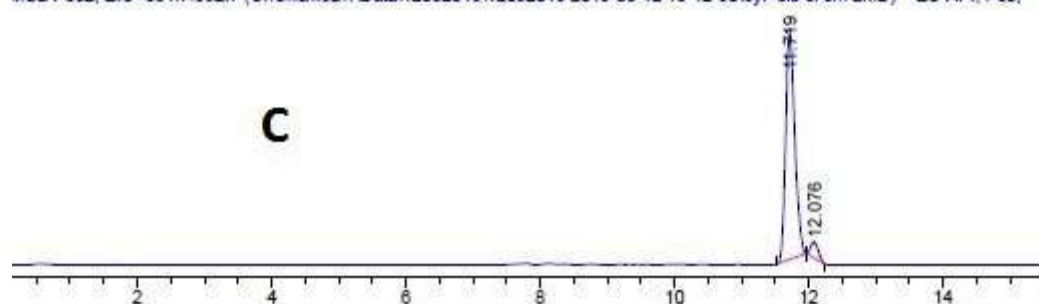

Fig. S3 MS-TIC of A - RD, B - CLB and C - IRD-CLB shown in Fig. S2,B.

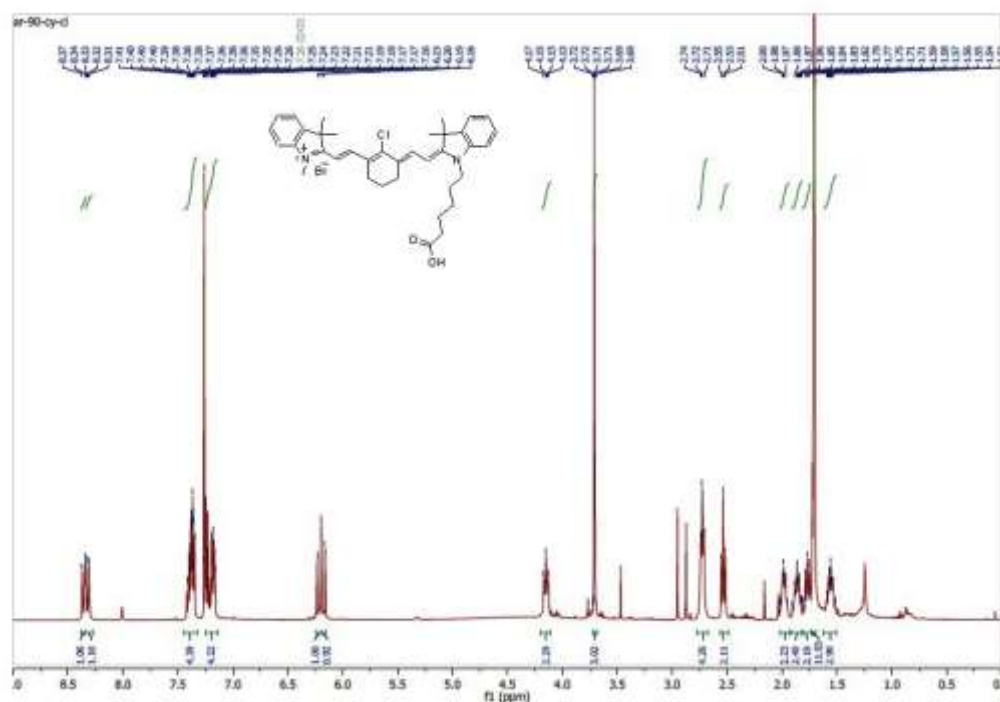

Fig. S4 <sup>1</sup>H NMR spectrum of compound 4 (400 MHz, CDCl<sub>3</sub>).

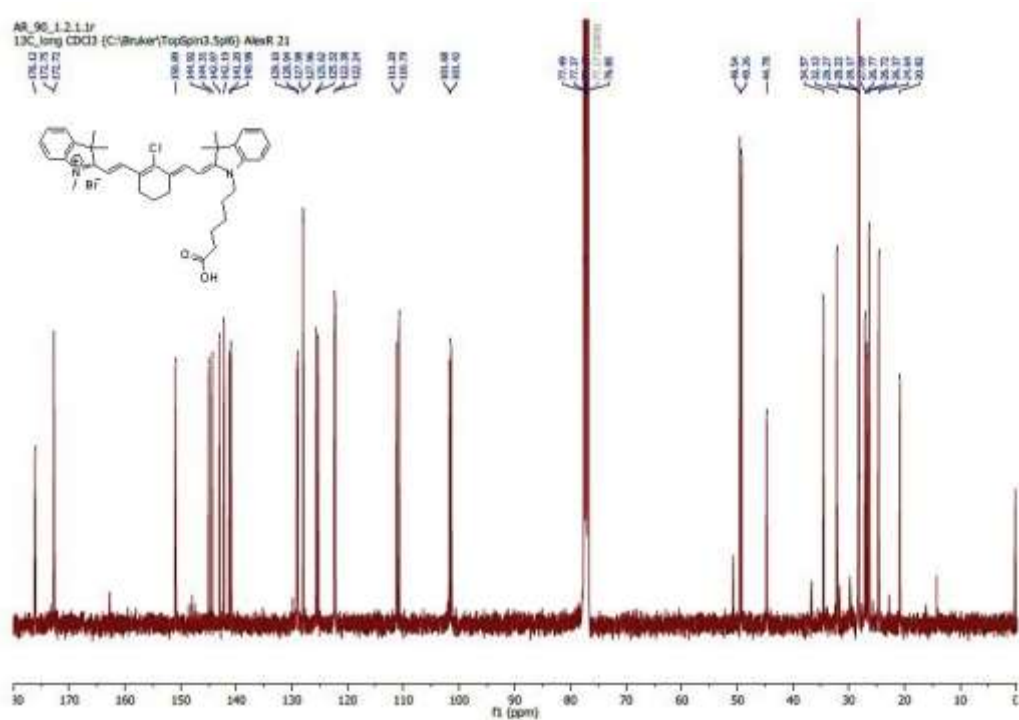

Fig. S5  $^{13}\text{C}$  NMR spectrum of compound 4 (101 MHz,  $\text{CDCl}_3$ ).

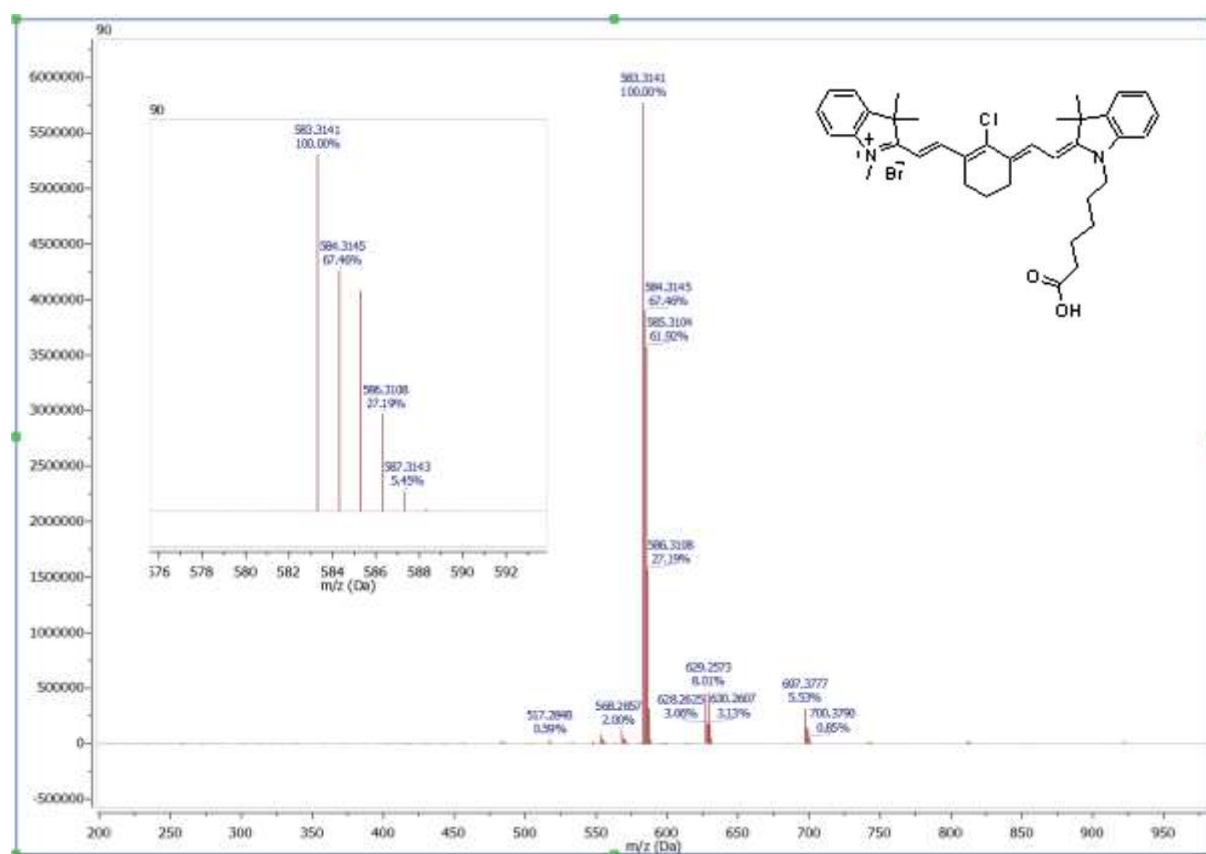

Fig. S6 HRMS spectrum of compound 4.

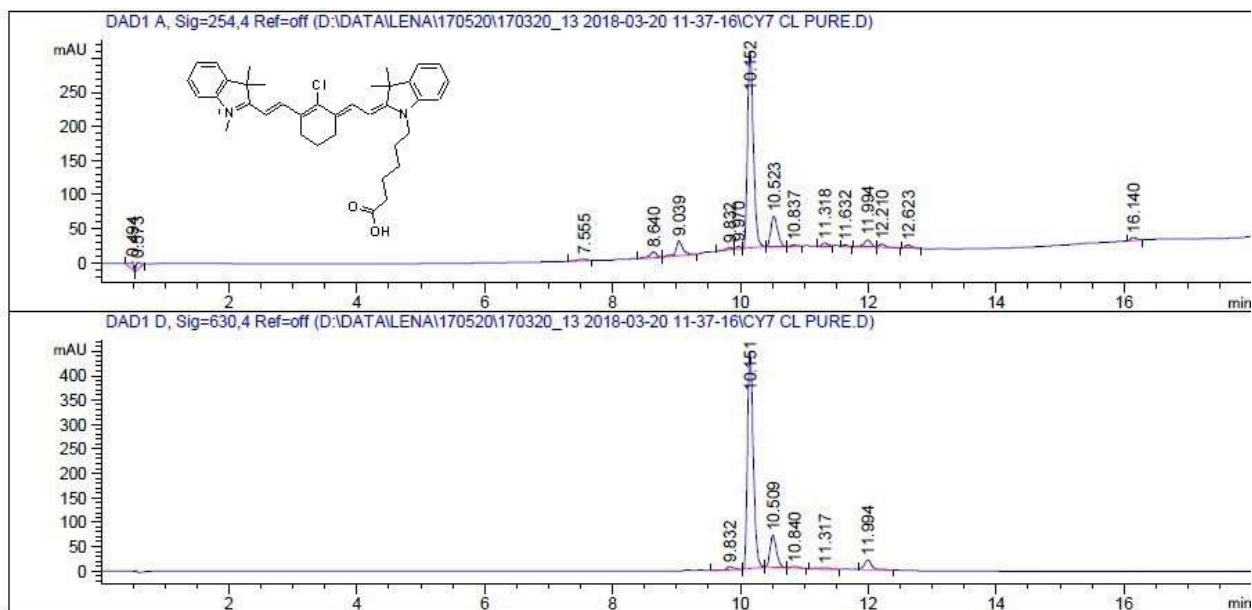

Fig. S7 HPLC chromatogram of compound 4.

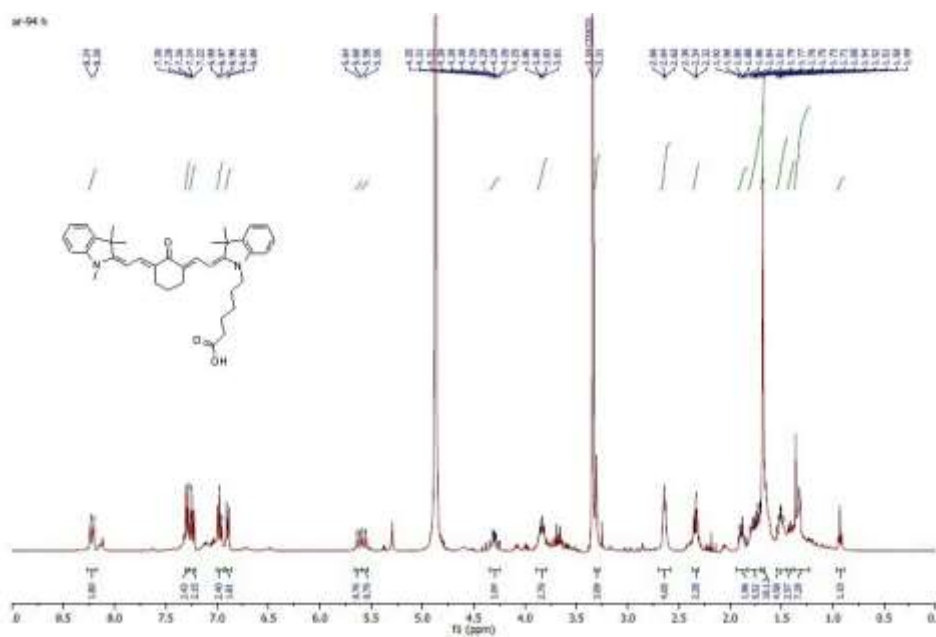

Fig. S8  $^1\text{H}$  NMR spectrum of RD (400 MHz, MeOD).

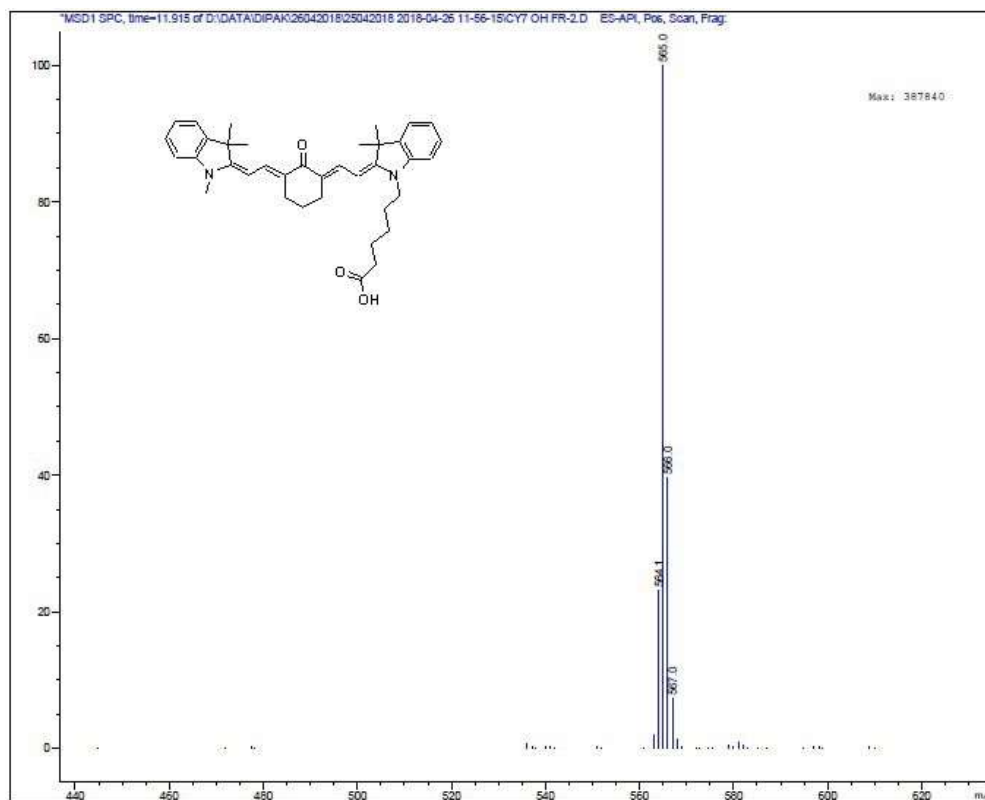

Fig. S9 MS spectrum of RD.

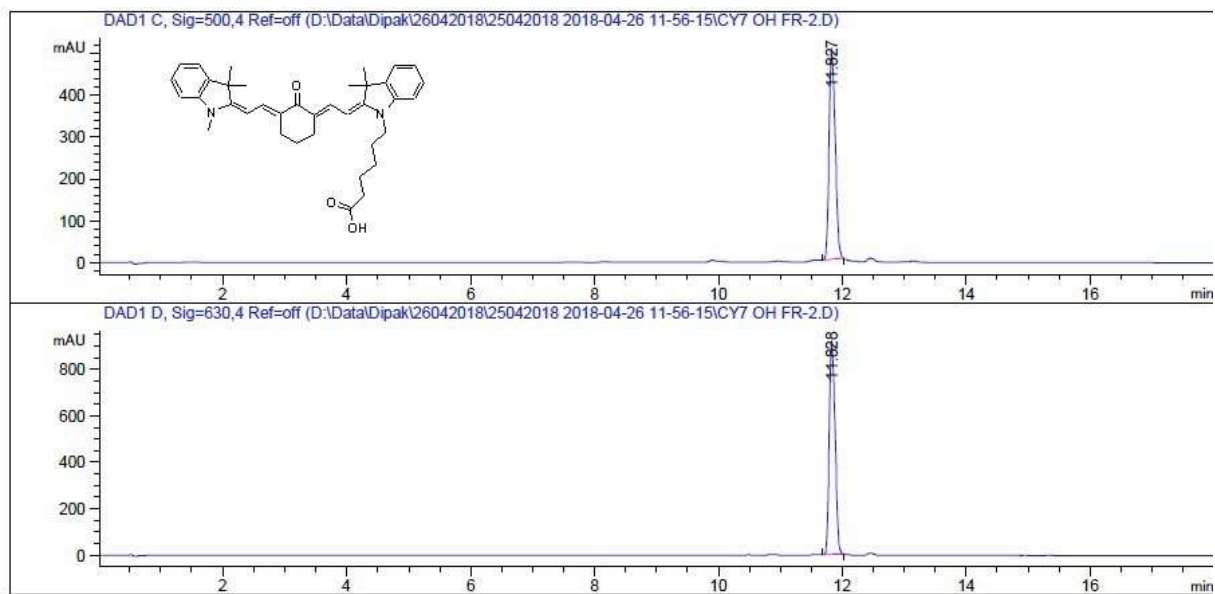

Fig. S10 HPLC chromatogram of RD.

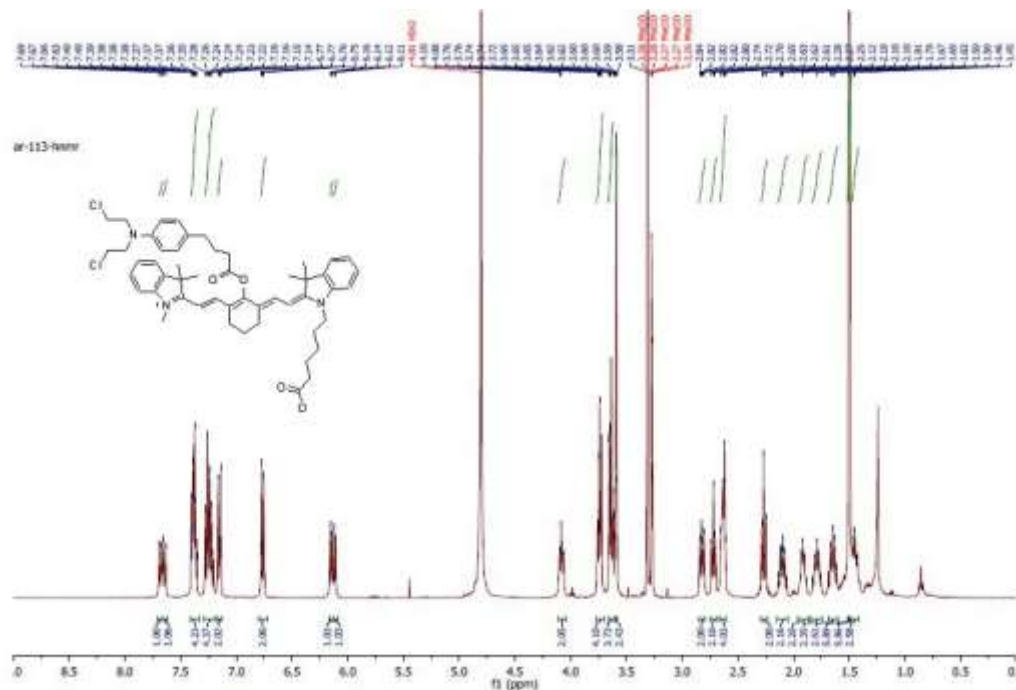

Fig. S11 <sup>1</sup>H NMR spectrum of IRD-CLB (400 MHz, MeOD).

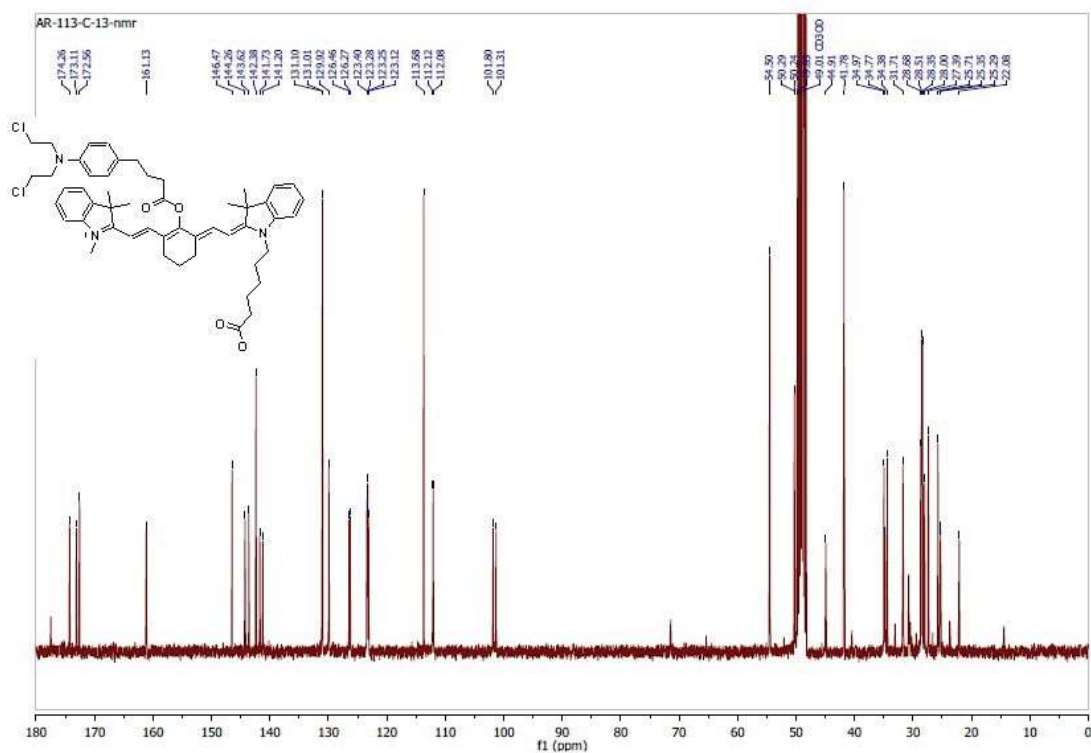

Fig. 12 <sup>13</sup>C NMR spectrum of IRD-CLB (101 MHz, MeOD).

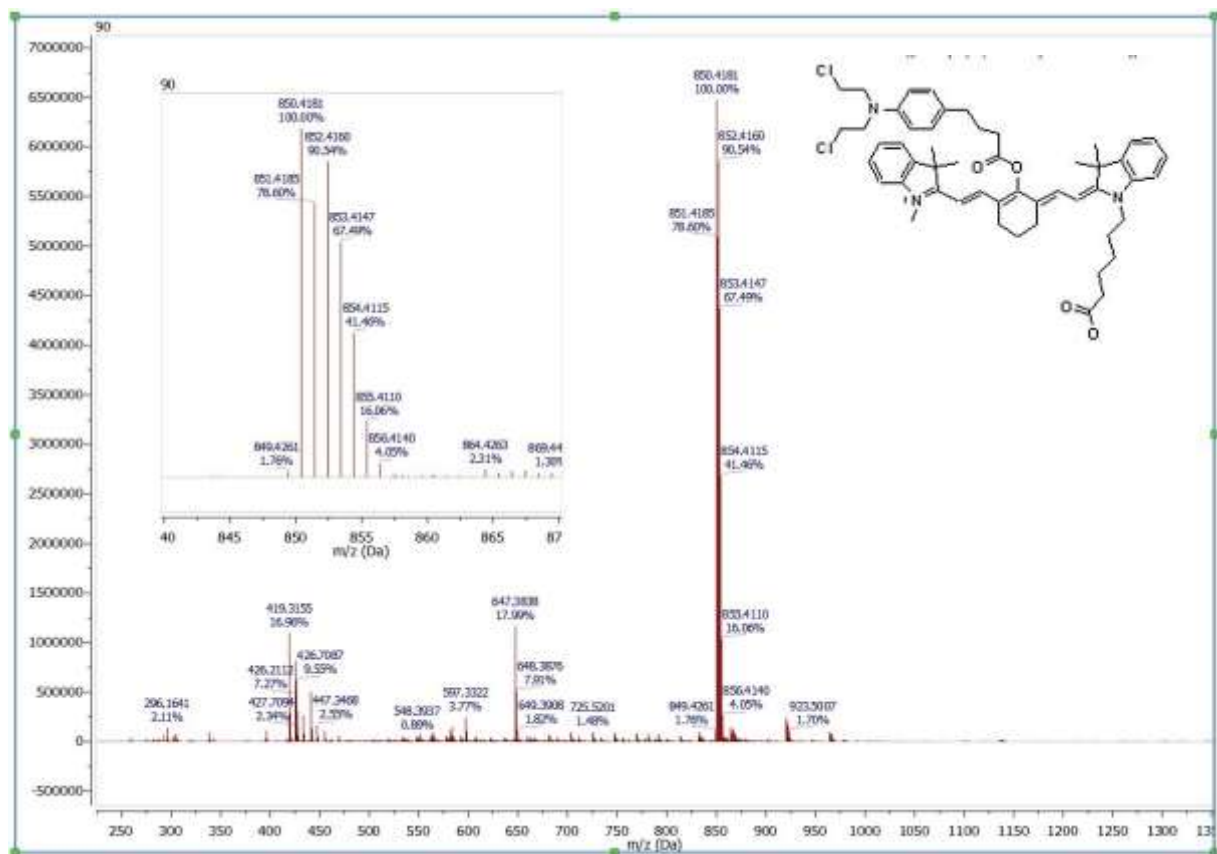

Fig. S13 HRMS spectrum of IRD-CLB.

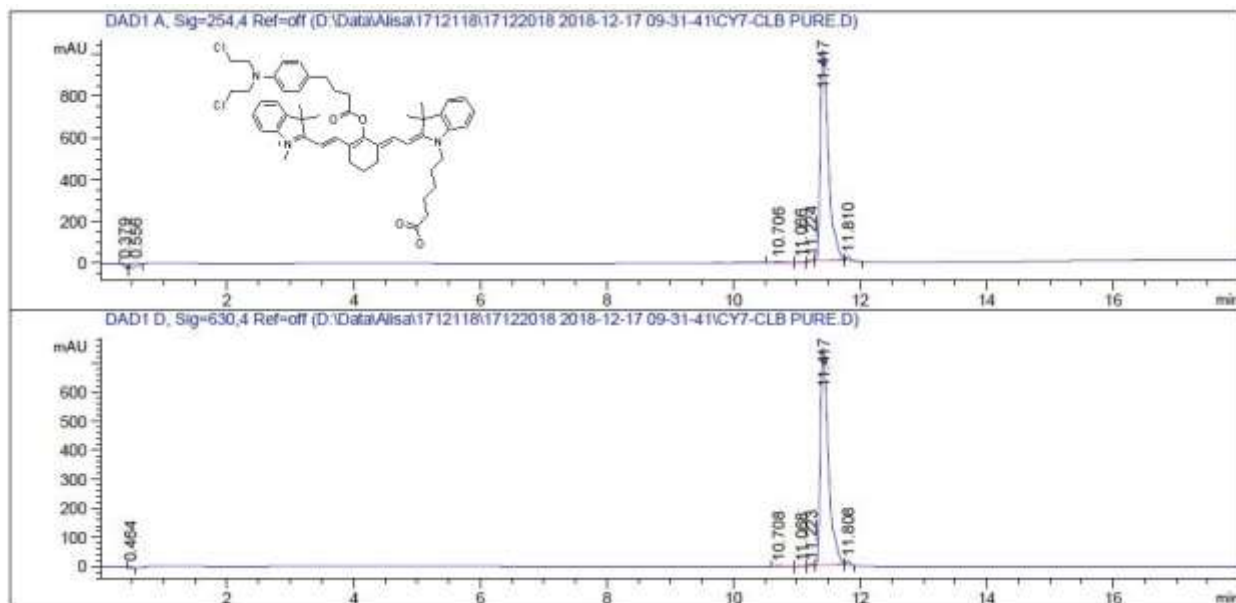

Fig. S14 HPLC chromatogram of IRD-CLB.



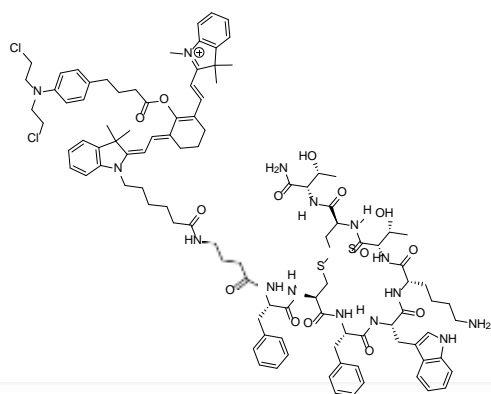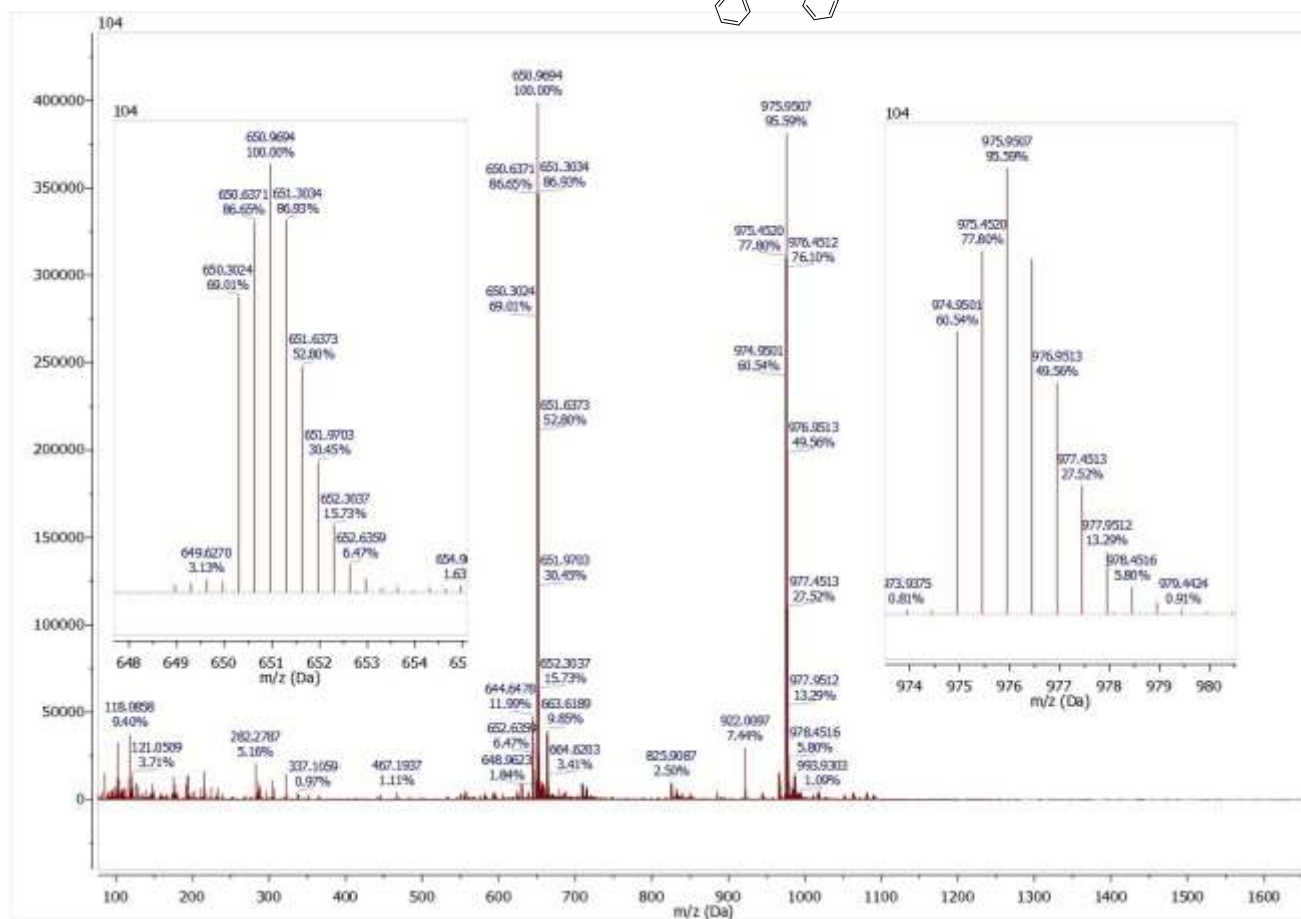

Fig. S15 HRMS spectrum of 5-CLB.

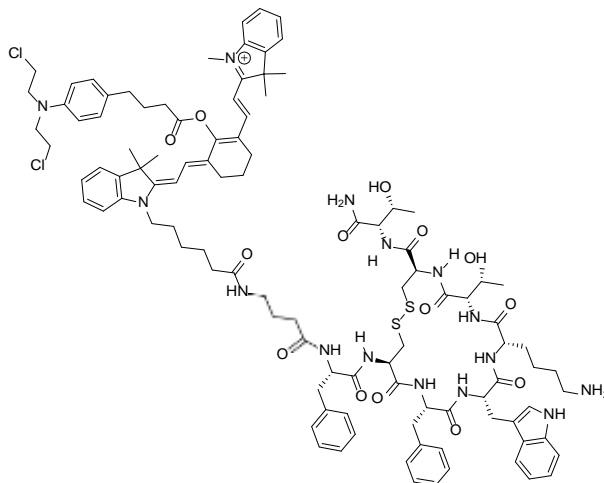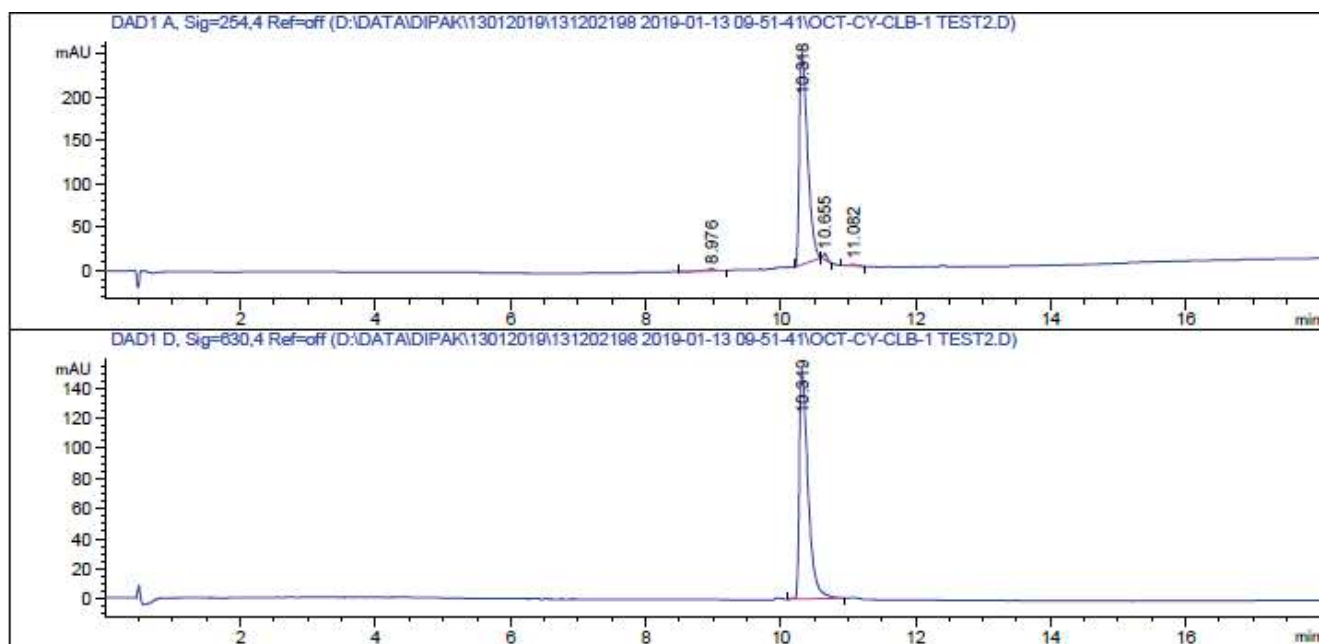

=====  
 Area Percent Report  
 =====

Sorted By : Signal  
 Multiplier : 1.0000  
 Dilution : 1.0000  
 Do not use Multiplier & Dilution Factor with ISTDs

Signal 1: DAD1 A, Sig=254,4 Ref=off

| Peak # | RetTime [min] | Type | Width [min] | Area [mAU*s] | Height [mAU] | Area %  |
|--------|---------------|------|-------------|--------------|--------------|---------|
| 1      | 8.976         | BB   | 0.1063      | 21.00398     | 2.65579      | 0.9804  |
| 2      | 10.318        | BB   | 0.1359      | 2081.61768   | 243.19525    | 97.1676 |
| 3      | 10.655        | BB   | 0.0624      | 27.72397     | 6.97355      | 1.2941  |

Fig. S16 HPLC chromatogram of 5-CLB.

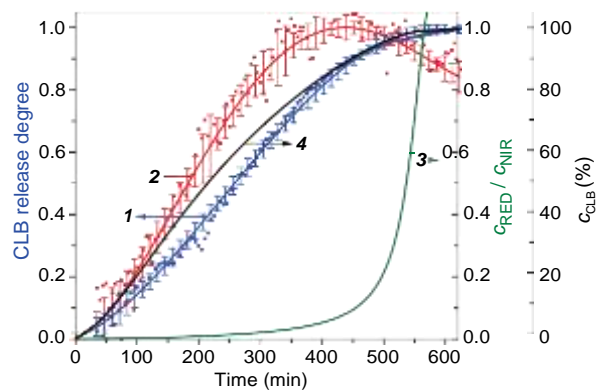

**Fig. S17** The change of the **CLB** release degree in Panc-1 cell line over time, which was calculated on the base of the drug cleavage profile (DrugDegree =  $c_{\text{CLB}}/c_{5\text{-CLB}} = 1 - B_{\text{NIR}}$ , Fig. 6) as the normalized ratio between the number of the released **CLB** molecules and the number of **5-CLB** conjugates in the sample (mean  $\pm$  standard error for three independent experiments). 2 – Increase of the relative concentration of **RD** ( $c_{\text{RD}} = B_{\text{Red}}$ ) (mean  $\pm$  standard error for three independent experiments). 3 – Ratiometric curve ( $c_{\text{RD}}/c_{5\text{-CLB}} = B_{\text{Red}}/B_{\text{NIR}}$ ). 4 – Relative concentration of free **CLB** molecules calculated as  $c_{\text{CLB}} = [B_{\text{Red}}/(B_{\text{Red}} + B_{\text{NIR}})] \times 100\%$ .
